1  
2  
3  
4  
5  
6  
7  
8  
9  
10  
11  
12  
13  
14  
15  
16  
17  
18  
19  
20  
21  
22  
23  
24  
25  
26  
27  
28  
29  
30

## Evaluating soluble Axl as a biomarker for glioblastoma: a pilot study

Daniel Raymond<sup>1¶</sup>, Melanie B. Fukui<sup>2,#a</sup>, Samuel Zwernik<sup>3,#b</sup>, Amin Kassam<sup>2,#a</sup>, Richard A. Rovin<sup>2¶\*</sup>, Parvez Akhtar<sup>3¶</sup>

<sup>1</sup>Department of Biology, Northern Michigan University, Marquette, Michigan, United States of America

<sup>2</sup>Aurora Neuroscience Innovation Institute, Milwaukee, Wisconsin, United States of America

<sup>3</sup>Advocate Aurora Research Institute, Milwaukee, Wisconsin, United States of America

<sup>#a</sup>Current Address: Department of Neurosciences, Northwest Community Hospital, Arlington Heights, Illinois, United States of America

<sup>#b</sup>Current Address: Department of Surgery, Henry Ford Health System, Detroit, Michigan, United States of America

\*Corresponding author

e-mail: [richard.rovin@aah.org](mailto:richard.rovin@aah.org) (RAR)

¶These authors contributed equally to this work.

## 31 **Abstract**

32 With current imaging, discriminating tumor progression from treatment effect following  
33 immunotherapy or oncolytic virotherapy of glioblastoma (GBM) is challenging. A blood based  
34 diagnostic biomarker would therefore be helpful. Axl is a receptor tyrosine kinase that is highly  
35 expressed by many cancers including GBM. Axl expression is regulated through enzymatic cleavage  
36 of its extracellular domain. The resulting fragment can be detected in serum as soluble Axl (sAxl).  
37 sAxl levels can distinguish patients with melanoma, hepatocellular carcinoma, and pancreatic ductal  
38 adenocarcinoma from healthy controls. This is a pilot study to determine if sAxl is a candidate  
39 biomarker for GBM. The sAxl levels in the serum of 40 healthy volunteers and 20 GBM patients  
40 were determined using an enzyme-linked immunosorbent assay (ELISA). Pre- and post- operative  
41 sAxl levels were obtained. Volumetric MRI evaluation provided GBM tumor volume metrics. There  
42 was no significant difference in the sAxl levels of the volunteers ( $30.16 \pm 1.88$  ng/ml) and GBM  
43 patients ( $30.74 \pm 1.96$  ng/ml)  $p=0.27$ . The postoperative sAxl levels were significantly higher than  
44 preoperative levels ( $32.32 \pm 2.26$  ng/ml vs  $30.74 \pm 1.96$  ng/ml,  $p=0.03$ ). We found no correlation  
45 between tumor volume and sAxl levels. Axl expression was low or absent in 6 of 11 (55%) patient  
46 derived GBM cell lines. Given the wide range of Axl expression by GBM tumors, sAxl may not be a  
47 reliable indicator of GBM. However, given the small sample size in this study, a larger study may be  
48 considered.

## 49 **Introduction**

50 Since 1977, interval imaging to monitor a brain tumor's response to treatment has been  
51 standard of care.[1] However, distinguishing true progression from treatment effect  
52 (pseudoprogression) is challenging, particularly so with the advent of immunotherapy and oncolytic

53 virotherapy.[2] A circulating biomarker that reflects the biological activity of the tumor would be  
54 useful. While available for breast cancer[3], lung cancer[4], melanoma[5], prostate cancer[6], and  
55 colorectal cancer[7], a circulating biomarker to monitor the course of gliomas remains elusive.

56 In earlier work, we found that patient derived glioblastoma (GBM) cell lines are susceptible  
57 to productive Zika virus infection especially when Axl is overexpressed.[8] Axl is a member of the  
58 TAM family of receptor tyrosine kinases (RTKs) along with Tyro3 and Mer. Like other RTKs, Axl  
59 has an extracellular domain for ligand binding, a transmembrane domain, and an intracellular  
60 domain. When stimulated through its ligand, growth-arrest specific factor 6 (Gas6), Axl activates  
61 myriad intracellular signaling pathways that contribute to the cancer phenotype, including: epithelial-  
62 mesenchymal transition, survival, proliferation, angiogenesis, chemotherapy resistance, and immune  
63 suppression.[9,10] (Fig 1, right)

64 **Fig 1, right. Axl signaling pathways and post-translational cleavage.** Axl is a transmembrane  
65 receptor tyrosine kinase. Gas-6 ligand binding leads to dimerization and activation of cellular  
66 pathways including: epithelial-mesenchymal transition, survival, proliferation, angiogenesis,  
67 chemotherapy resistance, and immune suppression.

68 Soluble Axl (sAxl) is the byproduct of regulation of Axl expression through post-  
69 translational deactivation by enzymatic cleavage. The sheddases ADAM10 and ADAM17 cleave the  
70 extracellular domain of Axl, and this product can be identified in the bloodstream as sAxl.[9] (Fig 1,  
71 left) Many cancers highly express Axl.[10] In these cancers, cleavage of the Axl ectodomain leads to  
72 high levels of circulating sAxl. In this way, sAxl can serve as a biomarker for hepatocellular  
73 carcinoma[11], pancreatic cancer[12], and melanoma[13].

74 **Fig 1, left. Axl signaling pathways and post-translational cleavage.** One mechanism to regulate  
75 Axl expression is cleavage of the extracellular domain by the sheddases ADAM10 and ADAM17.  
76 The cleavage product makes its way into the bloodstream as soluble Axl (sAxl).

77         Given that Axl is also overexpressed in GBM[14], we hypothesized that serum sAxl levels  
78 should be elevated and could serve as a biomarker as it does in other solid tumors. Therefore, we  
79 designed this pilot study to determine if circulating sAxl levels are elevated in patients with GBM  
80 compared to healthy controls and to determine if there is a relationship between tumor volume and  
81 sAxl levels.

## 82 **Materials and Methods**

83         This study was approved by the Northern Michigan University Institutional Review Board  
84 #HS19-1033 and the Aurora St Luke's Institutional Review Board #14-79. Participants signed a  
85 written informed consent document before enrolling in this study.

### 86 **Study Design**

87         This is a clinico-pathological correlation study using biospecimens (blood and tumor tissue)  
88 collected per an existing Aurora St Luke's Medical Center biorepository protocol (Prospective  
89 Biospecimen Collection, Storage, and Distribution).

### 90 **Study Populations**

91         Control cohort. Volunteers without pre-existing medical conditions were eligible to  
92 participate. The control group included students and faculty at Northern Michigan University,  
93 Marquette, Michigan. Student volunteers were recruited from the CLS 100 Phlebotomy course.

94 Their blood draws for soluble Axl analysis were part of their standard course work. Blood collection  
95 for the control cohort took place between April 8<sup>th</sup> and May 6<sup>th</sup>, 2019.

96 Glioblastoma patients. Patients with preoperative imaging consistent with GBM were eligible  
97 to participate in this study. Patients underwent medically indicated surgery at Aurora St Luke's  
98 Medical Center, Milwaukee, Wisconsin. Blood was collected before and after surgery and did not  
99 necessitate additional venipuncture. Blood collection for the GBM cohort took place between April  
100 1<sup>st</sup>, 2018 and October 31<sup>st</sup>, 2018.

101 Patient derived cell lines. The patient derived GBM cell lines used to determine Axl  
102 expression and sAxl levels in cell culture supernatant were previously established. They are not  
103 derived from patients participating in the current study.

## 104 **Serum collection**

105 The blood collection tubes were labeled with a randomly generated ID number. The samples  
106 were deidentified except for age, biological sex, cohort, and, for the GBM cohort, the time period  
107 (pre- or post- operative) of the blood draw.

108 Serum was separated from whole blood samples using gold-top serum separator tubes,  
109 which were then centrifuged at 1000 rpm for 5-10 minutes. Serum was aliquoted and stored at -80°  
110 C.

## 111 **Enzyme-linked immunosorbent assay for sAxl concentration**

112 Serum sAxl and cell culture supernatant sAxl concentrations were determined by enzyme  
113 linked immunosorbent assay (ELISA) using the commercially available human Axl DuoSet ELISA  
114 kit (R&D Biosystems, Minneapolis, MN) with previously reported optimizations.[15] The 96-well

115 ELISA plates were read in a multi-mode microplate reader (BioTek Synergy H1, Agilent  
116 Technologies, Santa Clara, CA). The optical density was measured at 450nm and 540nm. For  
117 wavelength correction, the 540nm measurement was subtracted from the corresponding 450nm  
118 value. After adjusting for background by normalizing against blank wells, a four-parameter  
119 logarithmic curve-fit was generated in GraphPad Prism. A standard curve using known sAxI  
120 standards was generated and used to interpolate the sAxI concentration of the samples. For each  
121 plate, standards were applied in duplicate, and samples were applied in triplicate. The assay was  
122 repeated either the same day using a duplicate 96-well plate on a separate day.

### 123 **MRI volumetric tumor analysis**

124 MRI scans were analyzed by a board certified neuroradiologist (M.B.F.) using BrightMatter  
125 Plan software (Synaptive Medical, Toronto, Canada). From gadolinium enhanced T-1 weighted  
126 images, a 3D model of the tumor was generated. From the pre-operative scans, total tumor volume,  
127 volume of enhancing tumor, and volume of necrotic tumor were determined. The ratios of  
128 enhancing tumor volume to total tumor volume, necrotic tumor volume to total tumor volume, and  
129 necrotic tumor volume to enhancing tumor volume were calculated.

130

### 131 **Cell lines and cultures**

132 Previously established and characterized patient derived glioblastoma stem cell lines were  
133 maintained in NeuroCult NS-A basal medium (Stemcell Technologies), supplemented with B-27  
134 without vitamin A, N-2, GlutaMAX and Pen/Strep (Thermo Fisher Scientific), BSA and heparin  
135 (Sigma-Aldrich), human recombinant bFGF and EGF (20 ng/ml each; PeproTech Inc.). All cell  
136 lines were routinely tested for mycoplasma contamination by using MycoAlert Detection Kit (Lonza  
137 Inc.).

138

## 139 **Western blotting**

140 Patient derived GBM stem cells were collected and lysed in RIPA buffer with complete  
141 protease inhibitor cocktail (Roche). Lysates were resolved by 4-12% SDS/PAGE and  
142 electrotransferred to nitrocellulose iBlot 2 Transfer Stacks (Life Technologies, IB23002).  
143 Membranes were blocked with 5% nonfat dry milk in 1x TBS and incubated overnight at 4°C with  
144 anti-AXL primary antibody (1: 1000 dilution, R&D Systems, AF154) or  $\beta$ -actin antibody (Sigma,  
145 A2066), and subsequently incubated for 1 hour at room temperature with HRP-coupled secondary  
146 antibody. All membranes were scanned using the Odyssey infrared imaging system (LI-COR  
147 Biosciences) in conjunction with the Clarity Western ECL Substrate (Bio-Rad).

148

## 149 **RNA extraction and qRT-PCR**

150 Total RNA was extracted from patient derived GBM stem cells using the RNeasy Mini Kit  
151 (Qiagen). Isolated RNAs (1  $\mu$ g total RNA) were then digested with 1 unit of DNase I (NEB) at  
152 37°C for 25 min to remove genomic DNA contamination before being processed for reverse  
153 transcription. Quantitative real time polymerase chain reaction (qRT-PCR) was performed using  
154 iTaq Universal SYBR Green One-Step Kit (Bio-Rad, 1725151) according to the manufacturer's  
155 instructions on a Roche LightCycler 480 instrument. The primers for Axl quantification were  
156 Forward primer 5'-GGTGGCTGTGAAGACGATGA-3'; Reverse primer 5'-  
157 CTCAGATACTCCATGCCACT-3'. The control primers were GAPDH Forward primer 5'-  
158 GGATTTGGTCGTATTGGG -3'; Reverse primer 5'- GGAAGATGGTGATGGGATT -3'.  
159 Relative expression quantification was performed based on the comparative CT Method ( $2^{-\Delta\Delta C_t}$ ),  
160 using GAPDH as an endogenous reference control.

## 161 **Statistical analysis**

162 Data from ELISAs were interpreted using a four-parameter logarithmic curve in GraphPad  
163 Prism version 10.1.0 (GraphPad Software, San Diego, CA). Determination of statistically significant  
164 variation between the two groups was performed using a two-tailed, unpaired student's t-test. For  
165 datasets with three or more groups were analyzed using one-way ANOVA with Dunnett's post-hoc  
166 multiple comparisons test. Graphical representation of datasets was performed in GraphPad with  
167 error bars representing either 95% confidence intervals or mean  $\pm$  SEM. Graphical representation of  
168 datasets was also performed using Stata version 15 (StataCorp, College Station, TX).

## 169 **Results**

### 170 **Baseline sAxl levels in the control and GBM populations**

171 There were 40 volunteers in the control group and 20 patients in the GBM group. The sAxl  
172 level for the healthy controls of  $30.16 \pm 1.88$  ng/ml (mean  $\pm$  SD) and the preoperative sAxl level in  
173 the GBM cohort of  $30.74 \pm 1.96$  ng/ml were not significantly different,  $p=0.27$ . (Table 1)

174 **Table 1. Characteristics of the healthy control and glioblastoma (GBM) cohorts.**

|              | Control (N=40)   | GBM (N=20)       | p value |
|--------------|------------------|------------------|---------|
| Age (years)  | $30.7 \pm 16.7$  | $64.2 \pm 10.8$  | =0.000  |
| Female       | 27 (67.5%)       | 8 (40%)          |         |
| sAxl (ng/ml) | $30.16 \pm 1.88$ | $30.74 \pm 1.96$ | =0.27   |

175 sAxl: soluble Axl

### 176 **sAxl levels in response to surgery**

177 There were 19 GBM patients with matched pre- and post- operative sAxl levels. We found  
178 that the post-operative sAxl level ( $32.32 \pm 2.26$  ng/ml) was significantly higher than the pre-operative



179 sAxl level ( $30.74 \pm 1.96$  ng/ml),  $p=0.03$ . In 11 (58%) patients, the preoperative sAxl level was greater  
180 than the postoperative level. (Fig 2)

181 **Fig 2. The relationship between pre- and post-operative soluble Axl levels.** The blue closed  
182 circles represent patients with postoperative sAxl levels lower than their preoperative levels. The red  
183 open circles represent patients with postoperative sAxl levels higher than preoperative. The diagonal  
184 line denotes pre- and post-operative sAxl equality.

### 185 **Correlation between preoperative tumor volume and sAxl levels**

186 Nineteen patients had matched preoperative tumor volumes and sAxl levels. There was no  
187 correlation between total, enhancing, and necrotic tumor volumes and sAxl level. Nor was there a  
188 correlation between necrotic to enhancing, necrotic to total, or enhancing to total volume ratios and  
189 sAxl levels. (Fig 3)

190 **Fig 3. The relationship between tumor volume metrics and soluble Axl levels.** Multiple scatter  
191 plots visualize the lack of correlation between tumor volume metrics and sAxl levels. The total tumor  
192 volume, necrotic tumor volume, and enhancing tumor volume were determined through volumetric  
193 analysis of preoperative MRI scans. The ratios of necrotic to total volume, enhancing to total volume,  
194 and necrotic to enhancing volume were then calculated.

### 195 **Axl expression and sAxl levels in patient derived glioblastoma cell** 196 **lines**

197 Tumor Axl expression from the GBM patients participating in this study was not determined.  
198 Therefore, to get a sense of Axl expression and sAxl levels in GBM, we performed Western blot (Fig  
199 4A) and qRT-PCR (Fig 4B) using our previously established GBM cell lines. We also determined sAxl

200 levels in the cell culture supernatants using ELISA. No or low Axl expression was seen in 55% of cell  
201 lines by Western blot and 33% of cell lines by qRT-PCR. The sAxl levels in the supernatants were not  
202 detected or low in 40% of cell lines. (Table 2)

203 **Fig 4. The expression of Axl and soluble Axl in patient derived glioblastoma cell lines.** (A) Axl  
204 protein expression as determined by Western blot. (B) Axl mRNA expression as determined by qRT-  
205 PCR.

206 **Table 2. Axl expression and sAxl levels in patient derived glioblastoma cell lines.**

| Cell Line | Western Blot | qRT-PCR | sAxl (ng/ml) |
|-----------|--------------|---------|--------------|
| 7978      | No           |         | 0            |
| 7715      | No           |         |              |
| 7997      | No           | No      | 0            |
| 7753      | No           | Low     | 0            |
| 7903      | Low          |         |              |
| 8034      | Low          | High    | 0.71         |
| 7754      | Med          | Low     | 4.73         |
| 7714      |              | Med     | 3.24         |
| 7730      | Med          | Med     | 5.89         |
| 8049      | Med          | High    | 1.92         |
| 8035      | High         | High    | 7.73         |
| 7759      | High         | High    | 3.17         |

207 This is a tabular summary of the Axl expression data from Fig 4 with the addition of sAxl levels in  
208 the cell culture supernatants as determined by ELISA.

209 Western Blot and qRT-PCR expression were qualitatively categorized as No, Low, Medium, or High  
210

## 211 Discussion

212 Soluble Axl (sAxl) has emerged as a promising biomarker for the early detection, diagnosis,  
213 and monitoring of various cancers[10], including pancreatic ductal adenocarcinoma[12],  
214 hepatocellular carcinoma[11,15], and melanoma[13]. We hypothesized that given the increased  
215 expression of Axl in GBM[14], circulating sAxl levels would correspondingly be elevated. We

216 designed this pilot study to determine if sAxl levels were elevated in patients with GBM and if levels  
 217 correlated with tumor burden. Though the sAxl levels in our GBM cohort were comparable to levels  
 218 reported in the literature for other cancers, we did not find a difference in sAxl levels between  
 219 healthy controls and GBM patients. (Table 3) Nor did we find a correlation between sAxl levels and  
 220 tumor volume.

221 **Table 3. Serum levels of soluble Axl in several cancers.**

| Cohort              | Number | sAXL (ng/ml)    | p value | Reference                                         |
|---------------------|--------|-----------------|---------|---------------------------------------------------|
| <b>Pancreas</b>     |        |                 |         | Martinez-Bosch, et al 10.1016/j.ebiom.2021.103797 |
| Hmar cohort         |        | Median, IQR     |         |                                                   |
| Normal              | 7      | 39.45, 13.03    | 0.002   |                                                   |
| Chr Pancreatitis    | 21     | 44.82, 21.75    | 0.003   |                                                   |
| PDAC                | 31     | 59.78, 25.38    | ref     |                                                   |
| HClinic cohort      |        | Median, IQR     |         |                                                   |
| Normal              | 46     | 40.03, 14.13    | <0.0001 |                                                   |
| Chr Pancreatitis    | 16     | 36.34, 11.05    | <0.0001 |                                                   |
| PDAC                | 80     | 52.66, 30.08    | ref     |                                                   |
| <b>Liver Cancer</b> |        | Median          |         | Fu, et al 10.14218/JCTH.2022.00285                |
| HCC                 | 190    | 33.55           | <0.05   |                                                   |
| Cirrhosis           | 128    | 29.98           |         |                                                   |
| Hepatitis           | 75     | 20.82           |         |                                                   |
| Healthy Control     | 82     | 11.39           |         |                                                   |
| <b>Melanoma</b>     |        | Mean, 95% CI    |         | Flem-Karlsen, et al 10.1371/journal.pone.0227187  |
| Stage III           | 160    | 26.6, 24.3-28.9 | <0.0001 |                                                   |
| Stage IV            | 50     | 54.1, 50.7-57.6 |         |                                                   |
| <b>GBM</b>          |        | Mean ± SD       |         | Current Study                                     |
| Patient             | 20     | 30.74±1.96      | 0.27    |                                                   |
| Healthy Control     | 40     | 30.16±1.88      |         |                                                   |

222 The serum levels of soluble Axl from patients in the current study (glioblastoma and healthy control  
 223 cohorts) are compared to those reported for patients with cirrhosis, hepatocellular carcinoma  
 224 (HCC), chronic pancreatitis (Chr Pancreatitis), pancreatic ductal adenocarcinoma (PDAC), and  
 225 melanoma. The literature references are provided.

226 As noted in Table 2 above, we found a range of Axl expression in our established GBM cell  
 227 lines, including no or low Axl expression in just over half of the specimens by Western blot.

228 Moreover, cell lines with no or low Axl expression had no or low sAxl in the cell culture  
229 supernatant. A close review of Figure 1A from the Hutterer et al., paper showed 16 of 30 GBM  
230 samples had no or low Axl mRNA expression.[14]

231 The regulation of Axl expression is complex and involves transcriptional, post-  
232 transcriptional, and post-translational pathways.[10] The post-translational cleavage of the Axl  
233 extracellular domain by ADAM10 and ADAM17 creates the soluble Axl fragments.[9,16] It is  
234 possible, then, that in our small cohort, no or low Axl expressing GBMs were over represented,  
235 lowering the mean sAxl level.

236 We further hypothesized that sAxl levels would decline following cytoreduction.  
237 Unexpectedly, we found postoperative sAxl levels were significantly higher than preoperative. The  
238 reason for this is unclear.

239 In the hope of using sAxl as a proxy for tumor burden[17], we determined total tumor  
240 volume, volume of enhancing (and presumably viable) tumor, and volume of necrotic tumor. We  
241 found no correlation between these tumor metrics and sAxl levels.

242 Though our findings that sAxl levels in GBM do not discriminate healthy controls from  
243 patients with tumor and do not reflect tumor burden are different from findings in other cancers,  
244 they are not unique. Gustafsson et al., found that sAxl levels in patients with renal cell carcinoma  
245 (RCC) were lower than in healthy controls, did not correlate with tumor Axl expression, nor tumor  
246 size.[18] This suggests that tumor type and its microenvironment impact Axl regulation and sAxl  
247 production.

248

## 249 **Conclusion**

250 While this study does not support sAxl as a biomarker for GBM, it is not fair to make a  
251 definitive statement given our small sample size. As identifying a GBM biomarker for detection,  
252 monitoring, and prognostication, is important, a larger study can be considered.

253

## 254 **Acknowledgements**

255 The authors thank the Aurora St Luke's BSRC department for biospecimen management  
256 and deidentification of MRI scans.

## 257 **References**

- 258 1. Levin VA, Crafts DC, Norman DM, Hoffer PB, Spire JP, Wilson CB. Criteria for evaluating  
259 patients undergoing chemotherapy for malignant brain tumors. *J Neurosurg.* 1977  
260 Sep;47(3):329–35.
- 261 2. Wen PY, van den Bent M, Youssef G, Cloughesy TF, Ellingson BM, Weller M, et al. RANO  
262 2.0: Update to the Response Assessment in Neuro-Oncology Criteria for High- and Low-  
263 Grade Gliomas in Adults. *J Clin Oncol.* 2023;41(33):5187–99.
- 264 3. Dawson S-J, Tsui DWY, Murtaza M, Biggs H, Rueda OM, Chin S-F, et al. Analysis of  
265 circulating tumor DNA to monitor metastatic breast cancer. *N Engl J Med.* 2013  
266 Mar;368(13):1199–209.
- 267 4. Oxnard GR, Paweletz CP, Kuang Y, Mach SL, O'Connell A, Messineo MM, et al.  
268 Noninvasive detection of response and resistance in EGFR-mutant lung cancer using  
269 quantitative next-generation genotyping of cell-free plasma DNA. *Clin cancer Res an Off J*  
270 *Am Assoc Cancer Res.* 2014 Mar;20(6):1698–705.

- 271 5. Tsao SC-H, Weiss J, Hudson C, Christophi C, Cebon J, Behren A, et al. Monitoring response  
272 to therapy in melanoma by quantifying circulating tumour DNA with droplet digital PCR for  
273 BRAF and NRAS mutations. *Sci Rep*. 2015 Jun;5:11198.
- 274 6. Hennessey DB, Lynn C, Templeton H, Chambers K, Mulholland C. The PSA tracker: a  
275 computerised health care system initiative in Northern Ireland. *Ulster Med J*. 2013  
276 Sep;82(3):146–9.
- 277 7. Campos-da-Paz M, Dórea JG, Galdino AS, Lacava ZGM, de Fatima Menezes Almeida  
278 Santos M. Carcinoembryonic Antigen (CEA) and Hepatic Metastasis in Colorectal Cancer:  
279 Update on Biomarker for Clinical and Biotechnological Approaches. *Recent Pat Biotechnol*.  
280 2018;12(4):269–79.
- 281 8. Zwernik SD, Adams BH, Raymond DA, Warner CM, Kassam AB, Rovin RA, et al. AXL  
282 receptor is required for Zika virus strain MR-766 infection in human glioblastoma cell lines.  
283 *Mol Ther oncolytics*. 2021 Dec;23:447–57.
- 284 9. Miller MA, Sullivan RJ, Lauffenburger DA. Molecular pathways: Receptor ectodomain  
285 shedding in treatment, resistance, and monitoring of cancer. *Clin Cancer Res*.  
286 2017;23(3):623–9.
- 287 10. Tang Y, Zang H, Wen Q, Fan S. AXL in cancer: a modulator of drug resistance and  
288 therapeutic target. *J Exp Clin Cancer Res [Internet]*. 2023;42(1):1–14. Available from:  
289 <https://doi.org/10.1186/s13046-023-02726-w>
- 290 11. Fu CX, Li J, Chen Z Da, Cao YP, Zhang HL, Sui HT, et al. Diagnostic Efficacy and Possible  
291 Underlying Mechanisms of Noninvasive Clinical Markers in Hepatocellular Carcinoma. *J Clin*  
292 *Transl Hepatol [Internet]*. 2023;11(4):889–98. Available from:

- 293 <https://www.doi.org/10.14218/JCTH.2022.00285>
- 294 12. Martínez-Bosch N, Cristóbal H, Iglesias M, Gironella M, Barranco L, Visa L, et al. Soluble  
295 AXL is a novel blood marker for early detection of pancreatic ductal adenocarcinoma and  
296 differential diagnosis from chronic pancreatitis. *eBioMedicine*. 2022;75.
- 297 13. Flem-Karlsen K, Nyakas M, Farstad IN, McFadden E, Wernhoff P, Jacobsen KD, et al.  
298 Soluble AXL as a marker of disease progression and survival in melanoma. *PLoS One*.  
299 2020;15(1):1–17.
- 300 14. Hutterer M, Knyazev P, Abate A, Reschke M, Maier H, Stefanova N, et al. Axl and growth  
301 arrest-specific gene 6 are frequently overexpressed in human gliomas and predict poor  
302 prognosis in patients with glioblastoma multiforme. *Clin Cancer Res*. 2008;14(1):130–8.
- 303 15. Dengler M, Staufer K, Huber H, Stauber R, Weiss KH, Starlinger P, et al. Soluble Axl is an  
304 accurate biomarker of cirrhosis and hepatocellular carcinoma development : results from a  
305 large scale multicenter analysis. 2017;8(28):46234–48.
- 306 16. Miller MA, Oudin MJ, Sullivan RJ, Wang SJ, Meyer AS, Im H, et al. Reduced proteolytic  
307 shedding of receptor tyrosine kinases is a post-translational mechanism of kinase inhibitor  
308 resistance. *Cancer Discov*. 2016;6(4):383–99.
- 309 17. Johansson G, Peng PC, Huang PY, Chien HF, Hua KT, Kuo ML, et al. Soluble AXL: a  
310 possible circulating biomarker for neurofibromatosis type 1 related tumor burden. *PLoS One*.  
311 2014;9(12):e115916.
- 312 18. Gustafsson A, Martuszewska D, Johansson M, Ekman C, Hafizi S, Ljungberg B, et al.  
313 Differential expression of Axl and Gas6 in renal cell carcinoma reflecting tumor advancement  
314 and survival. *Clin Cancer Res*. 2009;15(14):4742–9.

315

316

317

318



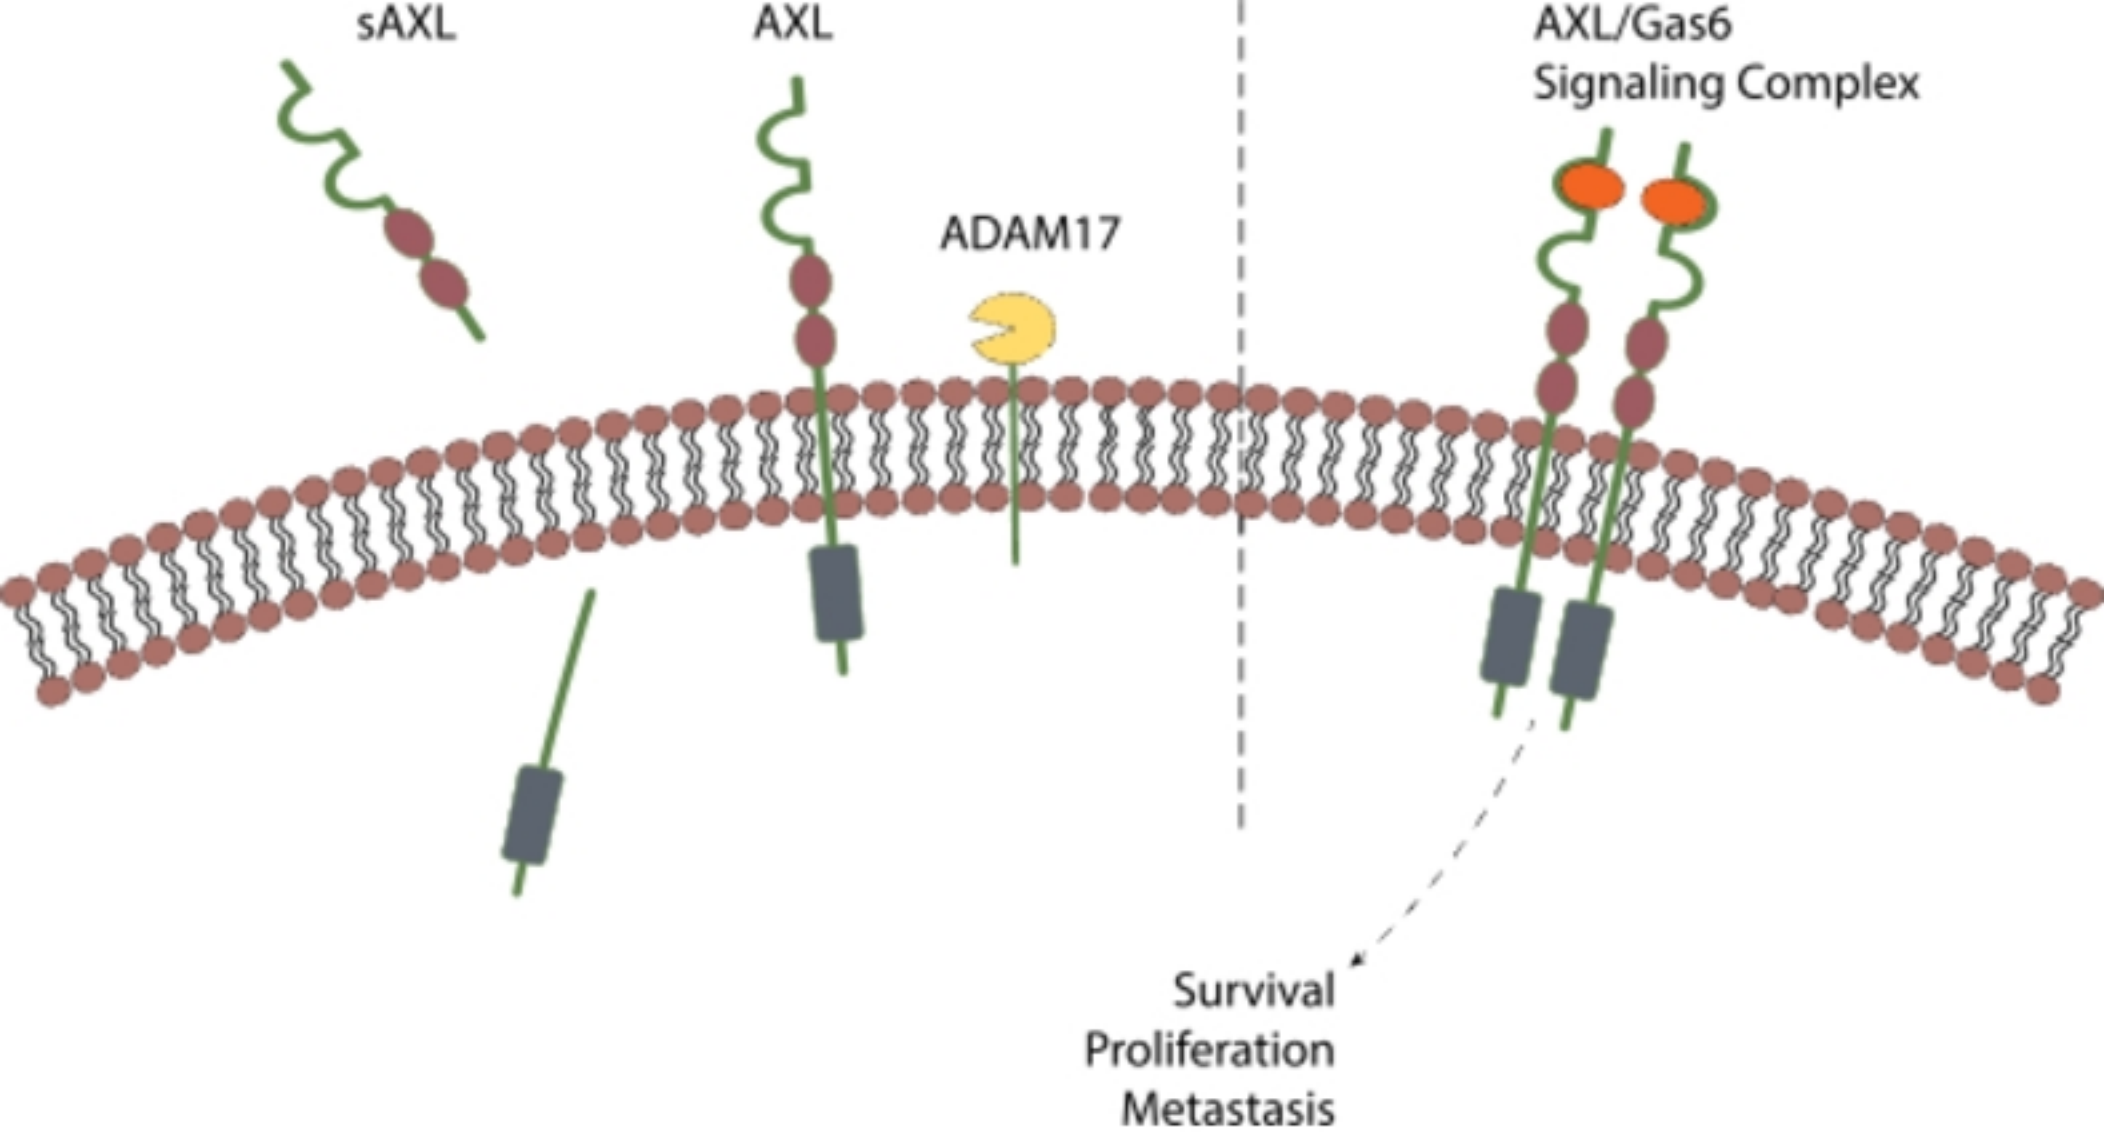

Figure 1

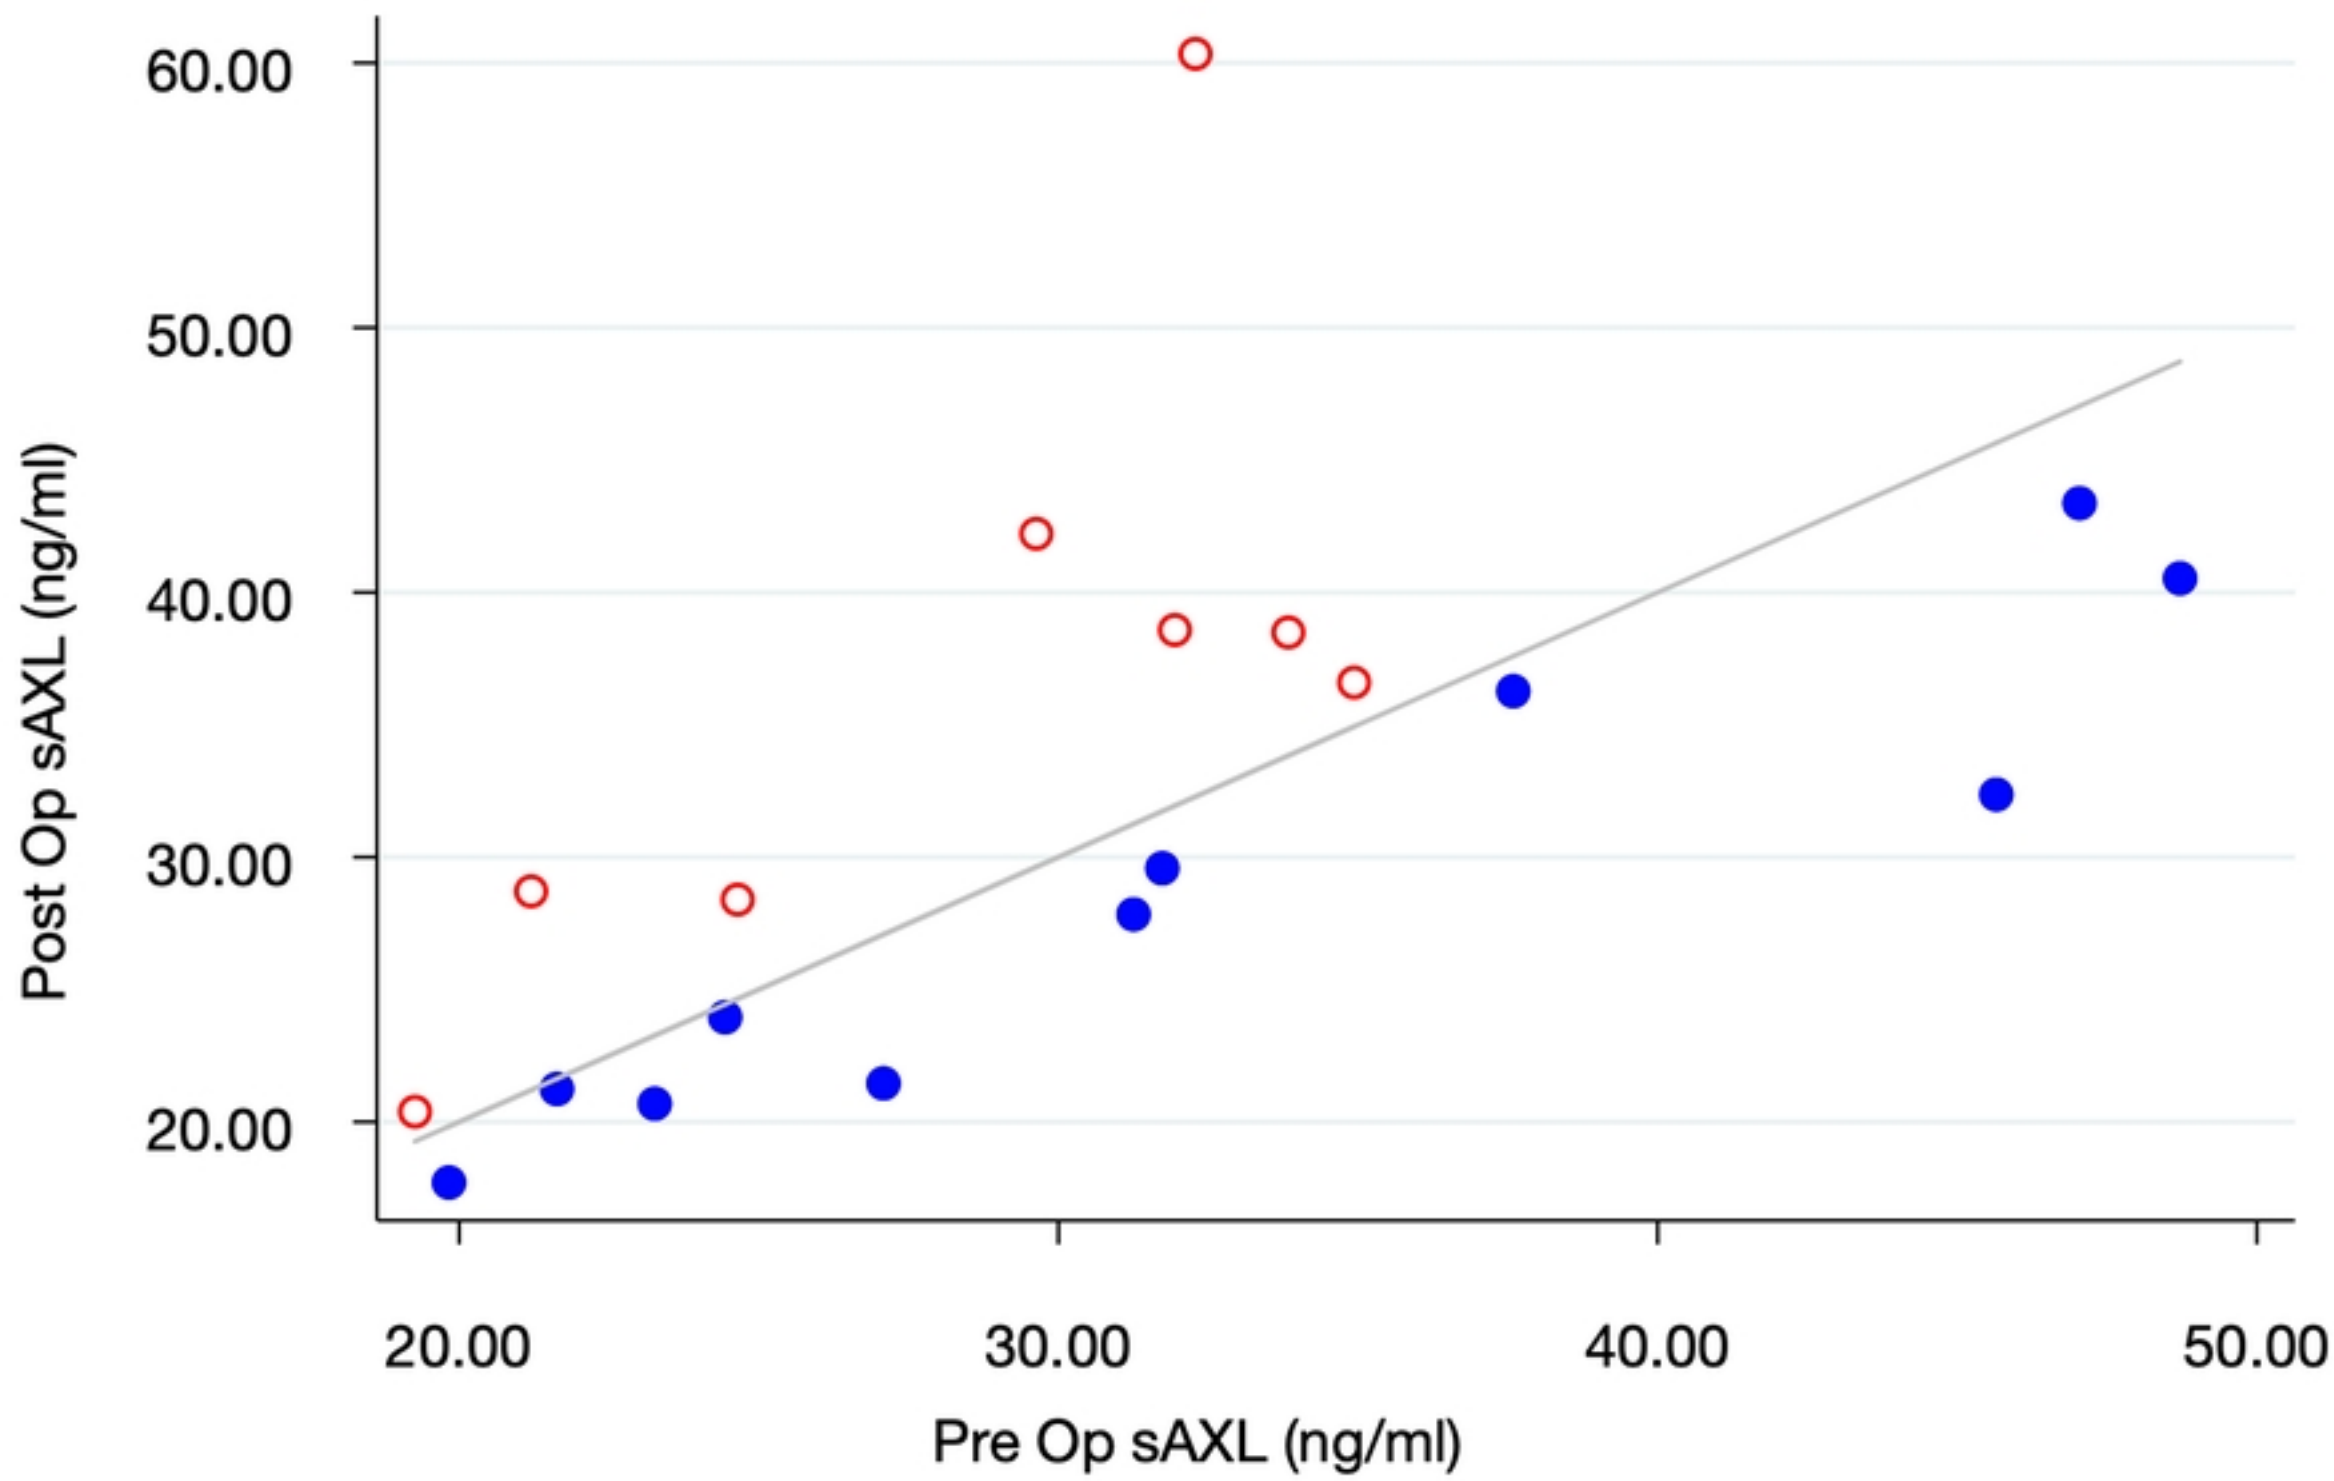

Figure 2

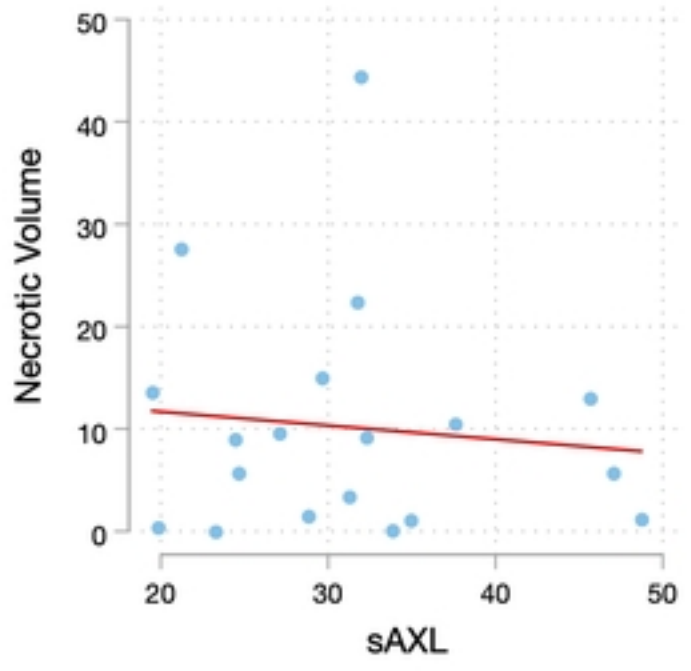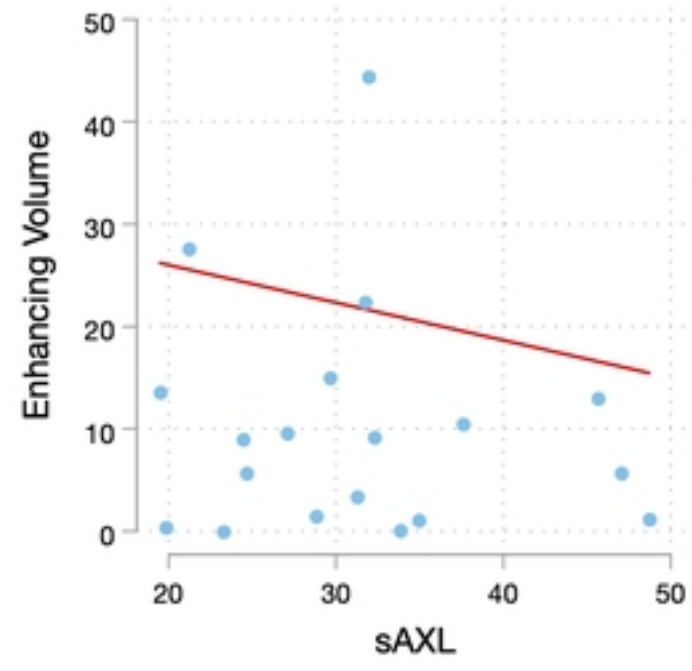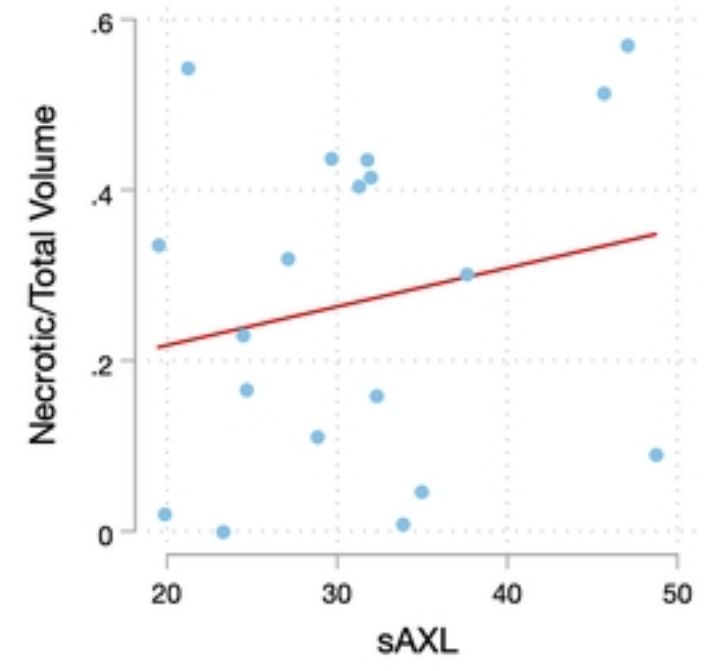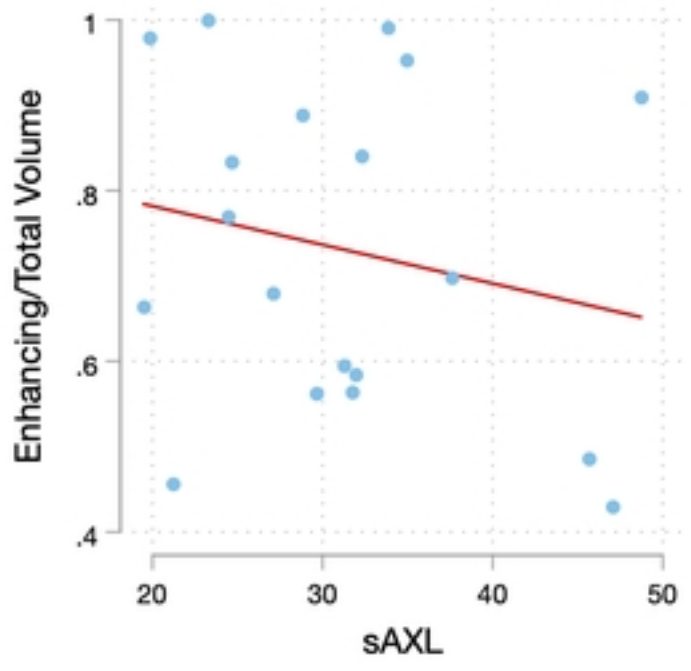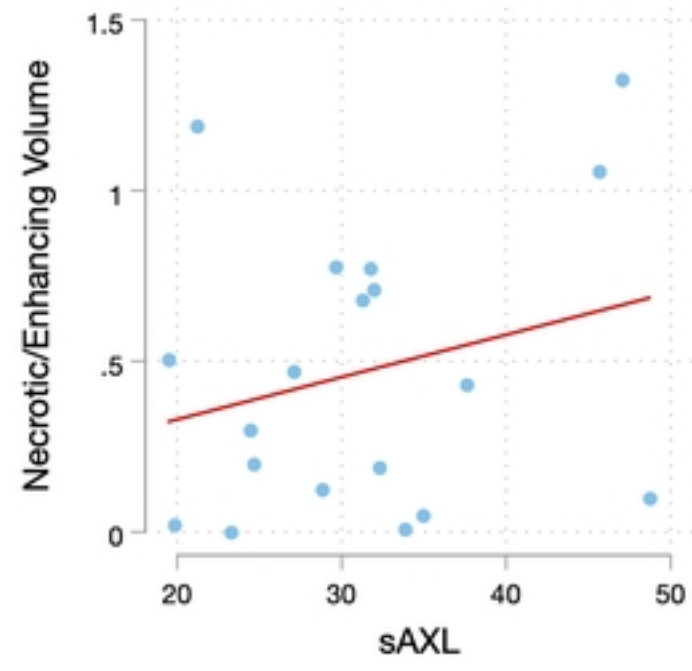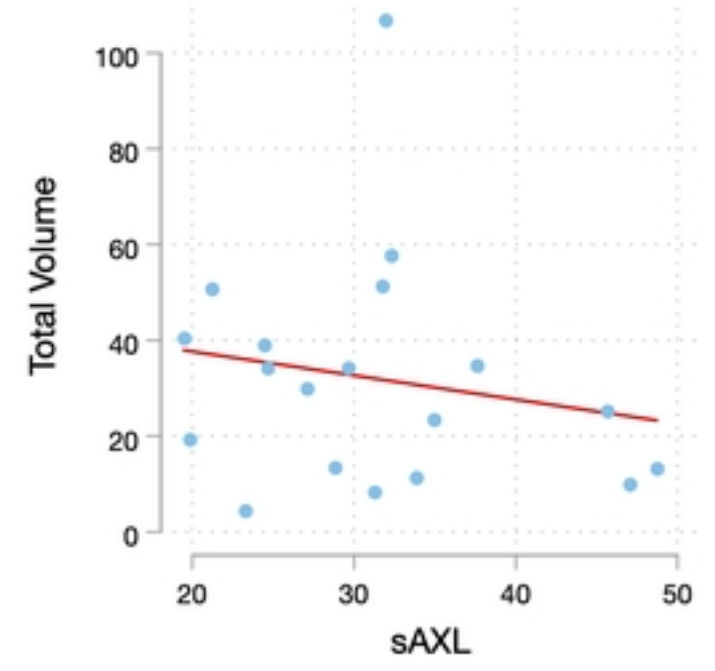

Figure 3

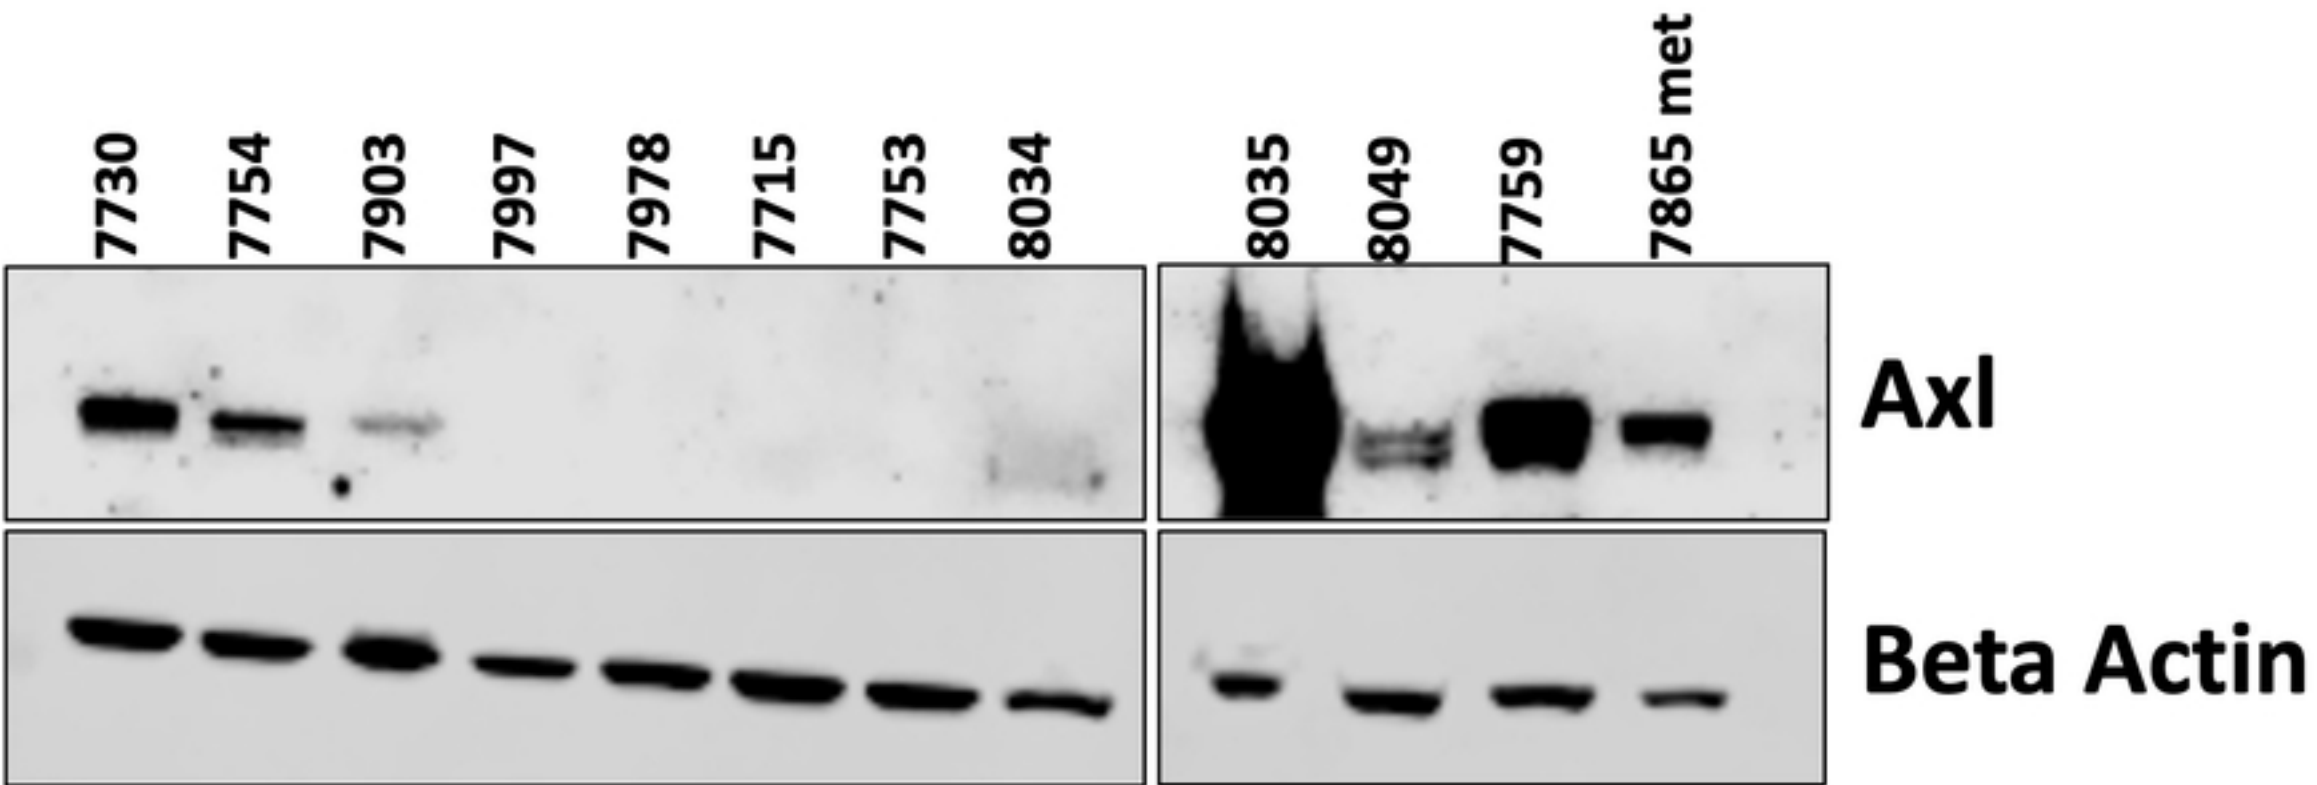

Figure 4A

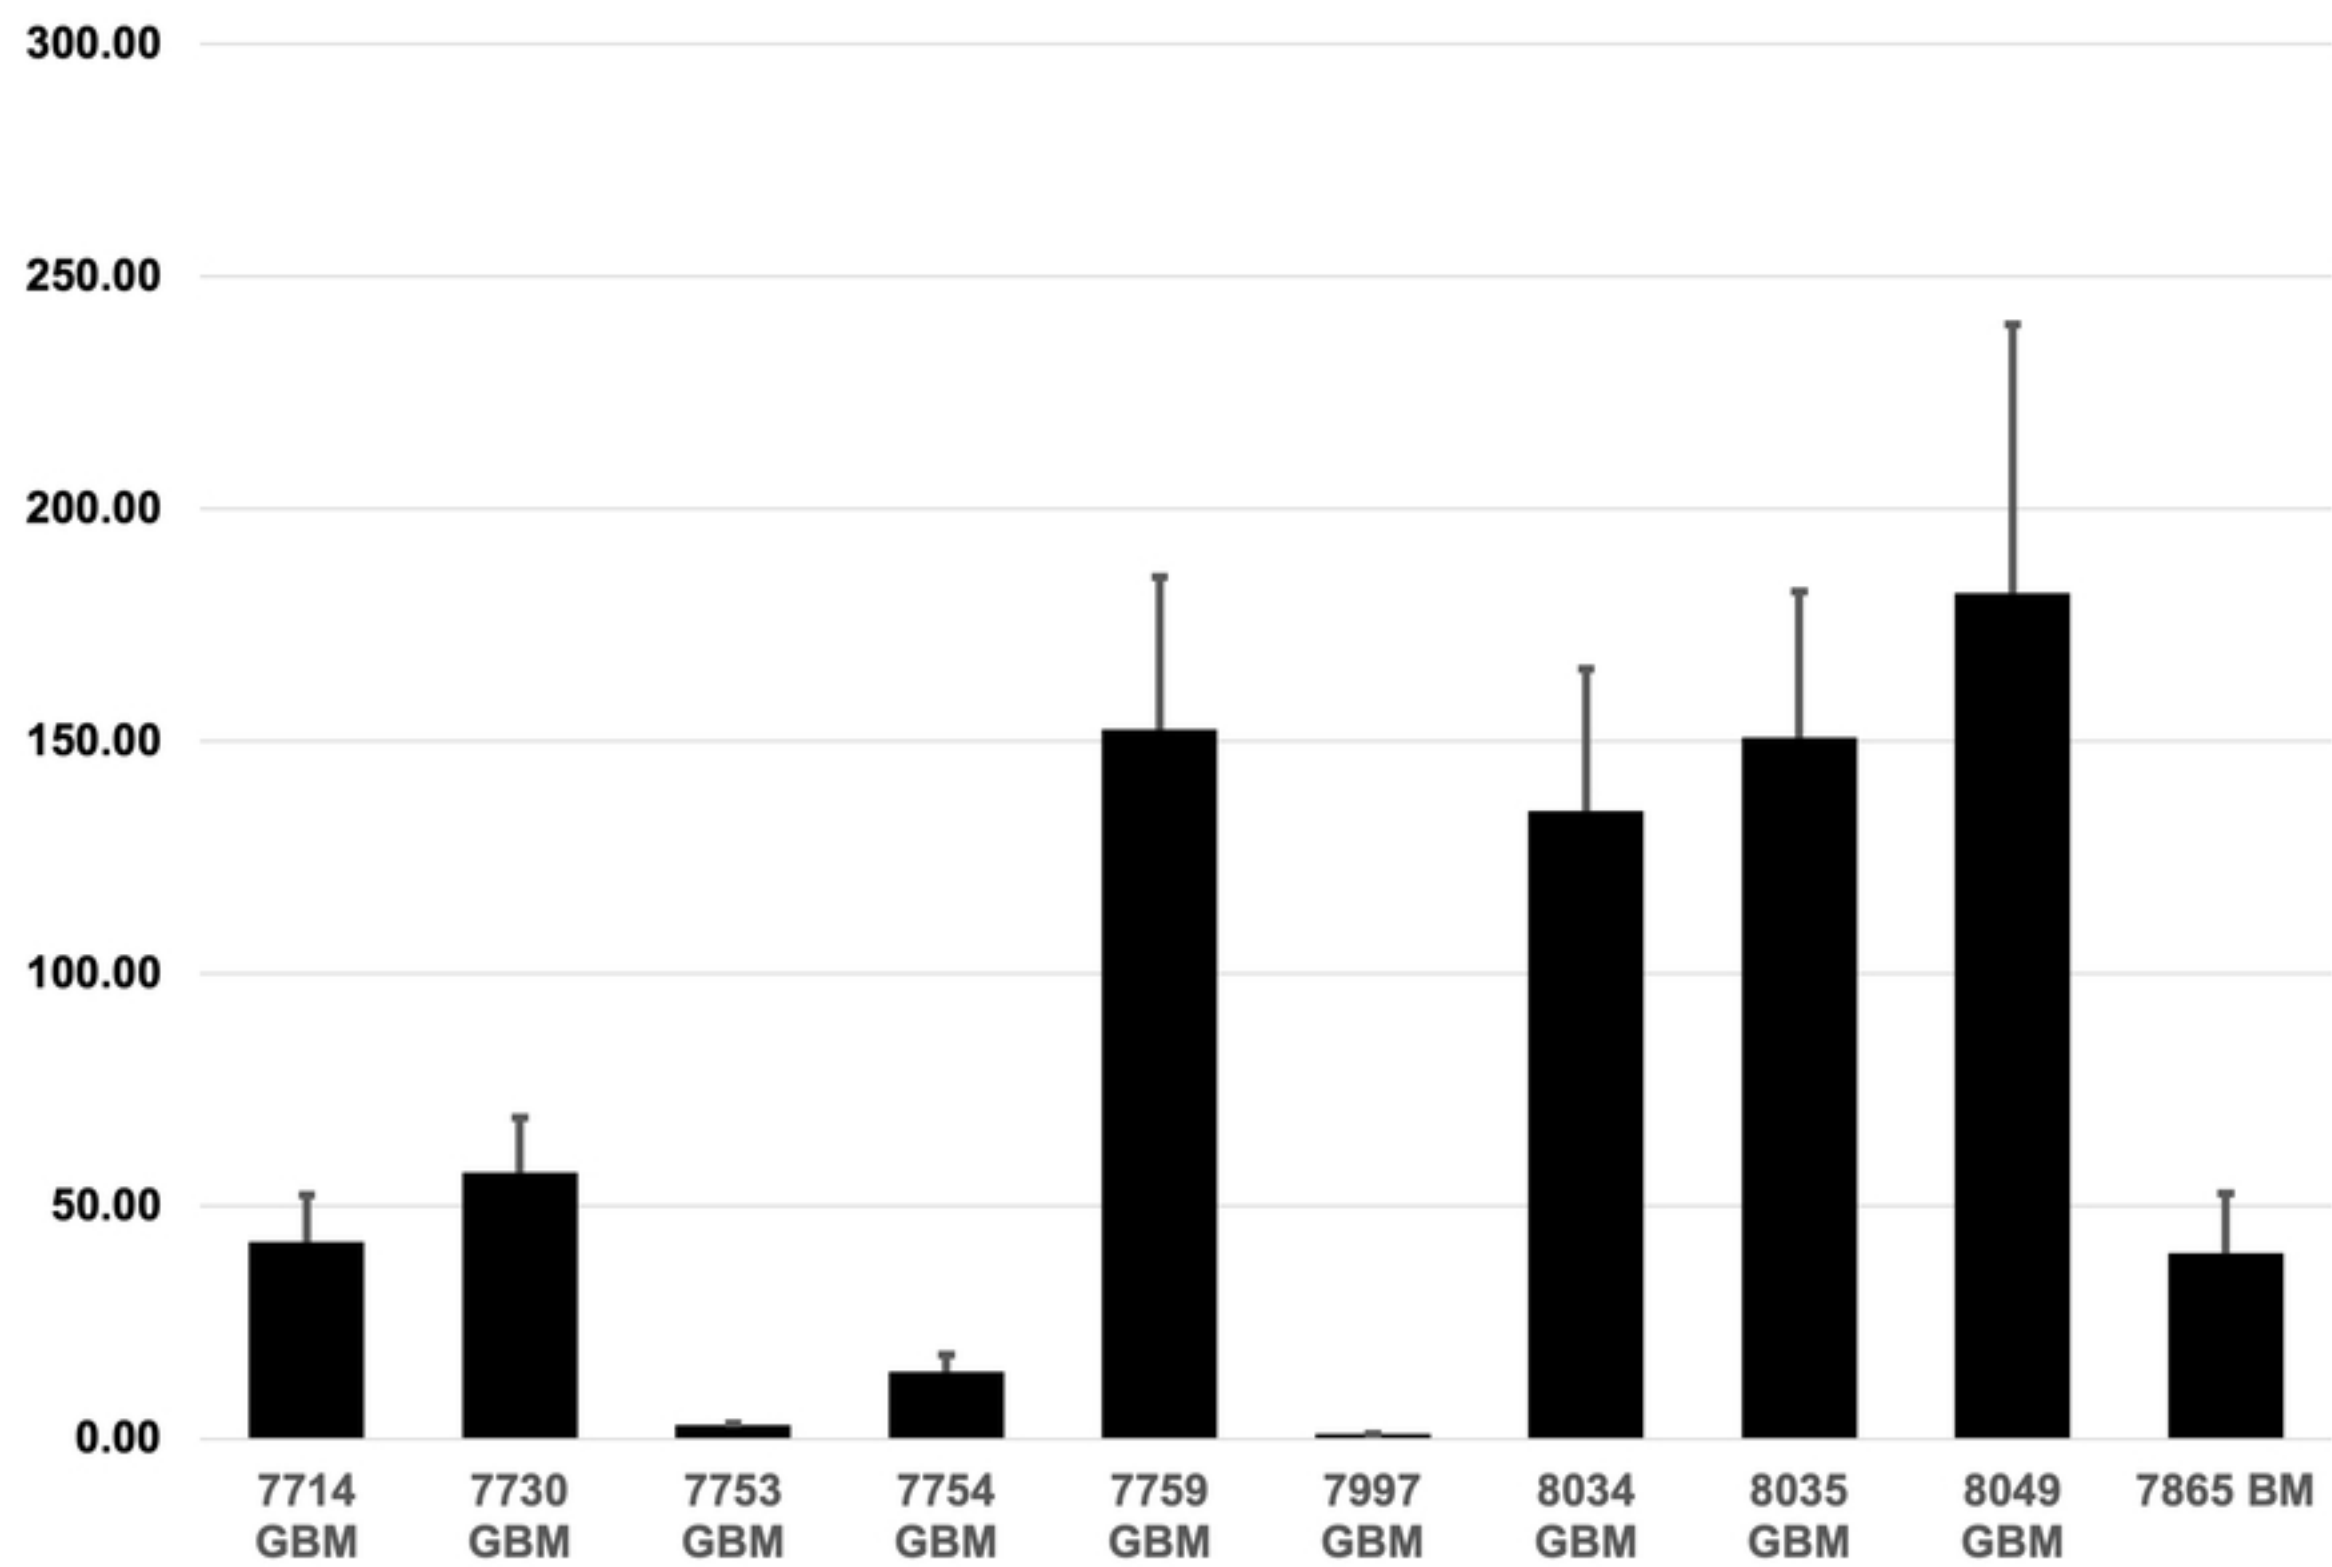

Figure 4B
